# Supplementary material for: Collaboration, competition and publication in toxicology: views of British Toxicology Society members
Source: Royal Society of Chemistry journal article supplement (doi:10.1039/c9tx00063a), 2019-01-01
Supplement: c9tx00063a1.pdf [file c9tx00063a1.pdf]

## Participant Information Sheet

### *Title*

*Attitudes of British Toxicology Society (BTS) members to resourcing and publication in toxicology*

### *Invitation*

*You are being invited to participate in a research project. Before agreeing to partake, it is important you understand the purpose of the research, why you have been asked to take part, the processes involved in data collection and how the information will be used. For these reasons please take time to read this document. If you have any questions, do not hesitate to contact the principle investigator (see details below).*

### *Purpose of project*

*The purpose of this questionnaire is to determine attitudes of members of the BTS to resourcing, conflict of interest and the peer review system. This survey is designed based on the results of an earlier pilot-scale survey.*

*This questionnaire has been designed to quantify assertions made in the author's publication in Toxicology Research: Collaboration and Competition: Ethics in Toxicology (Walker and Roberts, 2018) – available online at <http://pubs.rsc.org/en/content/articlelanding/2018/tx/c7tx00306d#!divAbstract>*

*If you would like a pdf of the article, please contact the principle investigator (see details below).*

*Findings from this current investigation will form the basis of a research paper to be submitted to Toxicology Research.*

### *Participation*

*Should you wish to not participate in the investigation or wish to withdraw at any time please inform the principle investigator (see details below).*

### *Confidentiality and Data Protection*

*All of the data collected during this investigation will be kept strictly confidential. It will not be possible to identify you, nor your institution, from the answers you give. Data will be stored on a password protected desktop.*

*In compliance with the General Data Protection Regulation which applies to any resident of the European Union and became law on May 25<sup>th</sup> 2018, we will not store or share any email or other contact information provided to us by participants during the conduct of this survey.*

## *Process*

*Accompanying this participant information sheet, you will find a 3-page questionnaire. There are 11 questions and it should take 15 minutes to complete. Please return your completed survey to [emma.s.walker@kcl.ac.uk](mailto:emma.s.walker@kcl.ac.uk) by 1<sup>st</sup> September 2018. Should you have any questions, do not hesitate to contact the principle investigator (see details below).*

## *Contacts for further information*

*The principle investigator for this project is Emma Walker, BSc. She is a Medicine, Health and Public Policy MSc candidate at King's College London and is available at:*

*Email: [emma.s.walker@kcl.ac.uk](mailto:emma.s.walker@kcl.ac.uk)*

*The project was overseen by Professor Ruth Roberts. She is a Chair and Professor of Drug Discovery at Birmingham University and the Co-founder of Apconix Ltd, she is available at:*

*Email: [ruth.roberts@apconix.com](mailto:ruth.roberts@apconix.com)  
[r.roberts.4@bham.ac.uk](mailto:r.roberts.4@bham.ac.uk)*
