# Supplementary material for: Collaboration, competition and publication in toxicology: views of British Toxicology Society members
Source: Royal Society of Chemistry journal article supplement (doi:10.1039/c9tx00063a), 2019-01-01
Supplement: c9tx00063a2.pdf [file c9tx00063a2.pdf]

# Attitudes of Toxicologists to Resourcing, Training and Publication

Study Questionnaire

---

## RESEARCH

Question 1: "I believe toxicology research is adequately resourced in the UK"

- Strongly Agree
- Agree
- Conflicted
- Disagree
- Strongly Disagree

Please explain the reasons for your answer

Question 2: "When compared to other disciplines, I believe the research funding councils and other funding bodies provide equality of opportunity to facilitate toxicology research"

- Strongly Agree
- Agree
- Conflicted
- Disagree
- Strongly Disagree

Please explain the reasons for your answer

Question 3: "I believe collaboration to be important in driving toxicology research in the UK"

- Strongly Agree
- Agree
- Conflicted
- Disagree
- Strongly Disagree

Please explain the reasons for your answer

Question 4: "When compared to other disciplines, I believe collaboration to be especially important in driving toxicology research"

- Strongly Agree
- Agree
- Conflicted
- Disagree
- Strongly Disagree

Please explain the reasons for your answer

Question 5: " I believe competition to be important in driving toxicology research in the UK"

- Strongly Agree
- Agree

- Conflicted
- Disagree
- Strongly Disagree

Please explain the reasons for your answer

Question 6: "When compared to other disciplines, I believe competition to be especially important in driving toxicology research"

- Strongly Agree
- Agree
- Conflicted
- Disagree
- Strongly Disagree

Please explain the reasons for your answer

Question 7: "I believe there is a good infrastructure to support research between academia, industry and the regulatory authorities"

- Strongly Agree
- Agree
- Conflicted
- Disagree
- Strongly Disagree

Please explain the reasons for your answer

Question 8: "I believe making toxicology research data openly available with as few restrictions as possible in a timely and responsible manner would improve the impact and efficiency of toxicological research"

- Strongly Agree
- Agree
- Conflicted
- Disagree
- Strongly Disagree

Please explain the reasons for your answer

---

## OUTPUTS AND PUBLICATIONS

Question 9: "When reading research publications, I consider whether there is a conflict of interest when assessing the validity of research"

- Strongly Agree
- Agree
- Conflicted
- Disagree
- Strongly Disagree

Please explain the reasons for your answer

Question 10: "I believe the current system of peer review for research outputs is a fair and appropriate system"

- Strongly Agree
- Agree
- Conflicted
- Disagree
- Strongly Disagree

Please explain the reasons for your answer

Question 11: "When peer reviewing research publications, I consider whether there is a conflict of interest when assessing the validity of research"

- Strongly Agree
- Agree
- Conflicted
- Disagree
- Strongly Disagree

Please explain the reasons for your answer

Question 12: "I believe reviewers are often not sufficiently trained to adequately and fairly judge the merit, quality and impact of toxicology research"

- Strongly Agree
- Agree
- Conflicted
- Disagree
- Strongly Disagree

Please explain the reasons for your answer

Question 13: "I believe double-blind peer review, where both reviewer and author are anonymised, is a good idea"

- Strongly Agree
- Agree
- Conflicted
- Disagree
- Strongly Disagree

Please explain the reasons for your answer

Question 14a: "I believe open access publication, where articles are available free at source, is a good idea"

- Strongly Agree
- Agree
- Conflicted
- Disagree
- Strongly Disagree

Please explain the reasons for your answer

Question 14b: Have you published research outputs using an open access route in the last two years?

Question 14c: If so, how was the cost for publication supported?

- Institute or Employer
- Collaborator or industry sponsor
- Competitive research award I received
- Competitive research award a co-author had received
- Funded personally
- Not applicable
- Other

---

## TOXICOLOGY TRAINING AND EDUCATION

My graduate education involved study on a specialised toxicology programme (i.e. BSc or MSc in toxicology)

If not, please indicate below the subject of your undergraduate and postgraduate (if applicable) studies.

Question 15: "I believe that toxicology is a stand-alone academic discipline in its own right"

- Strongly Agree
- Agree
- Conflicted
- Disagree
- Strongly Disagree

Please explain the reasons for your answer

Question 16: "I believe that the fundamentals of toxicology are adequately covered within diverse undergraduate programmes, with toxicology being a specialist subject for postgraduate study"

- Strongly Agree
- Agree
- Conflicted
- Disagree
- Strongly Disagree

Please explain the reasons for your answer

Question 17: "I believe that the current graduate workforce are sufficiently trained in the principles of toxicology"

- Strongly Agree
- Agree
- Conflicted
- Disagree
- Strongly Disagree

Please explain the reasons for your answer

Question 18: "I believe that university education in toxicology within the UK needs to be reappraised"

- Strongly Agree



- Agree
- Conflicted
- Disagree
- Strongly Disagree

Please explain the reasons for your answer

Question 19: The changes I would suggest towards improvement of toxicology education in the UK are?

---

## Feedback

Question 20: I am currently employed/associated within the following area of toxicology

- Academia (staff)
- Academia (student)
- Industry (Pharmaceutical)
- Industry (Chemical safety)
- Risk assessment
- Government agency
- Public Health
- Clinical Toxicology
- Other

If you have any feedback on any aspect of completing this questionnaire it would be greatly appreciated

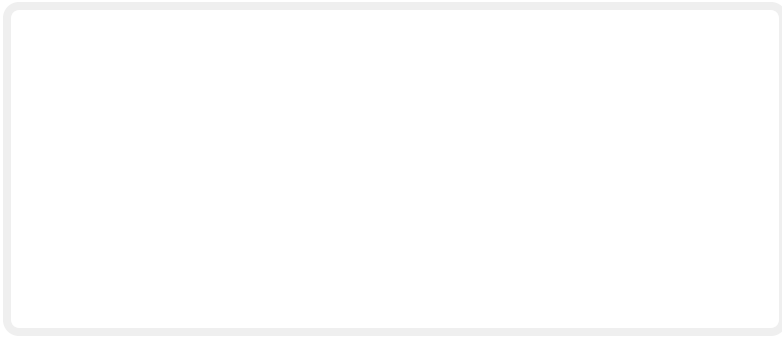

**Data Protection Statement**

All of the data collected during this investigation will be kept strictly confidential. It will not be possible to identify you, nor your institution or employer, from the answers you give. Data will be stored on a password protected server. In compliance with the General Data Protection Regulation which applies to any resident of the European Union and became law on May 25th 2018, we will not store or share any email or other contact information provided to us by participants during the conduct of this survey.

Submit
