# Supplementary material for: Collaboration, competition and publication in toxicology: views of British Toxicology Society members
Source: Royal Society of Chemistry journal article supplement (doi:10.1039/c9tx00063a), 2019-01-01
Supplement: c9tx00063a3.xlsx [file c9tx00063a3.xlsx]

## Sheet: Raw data
Entry #	Question 1: "I believe toxicology research is adequately resourced in the UK"	Please explain the reasons for your answer	Question 2: "When compared to other disciplines, I believe the research funding councils and other funding bodies provide equality of opportunity to facilitate toxicology research"	Please explain the reasons for your answer	Question 3: "I believe collaboration to be important in driving toxicology research in the UK"	Please explain the reasons for your answer	Question 4: "When compared to other disciplines, I believe collaboration to be especially important in driving toxicology research"	Please explain the reasons for your answer	Question 5: " I believe competition to be important in driving toxicology research in the UK"	Please explain the reasons for your answer	Question 6: "When compared to other disciplines, I believe competition to be especially important in driving toxicology research"	Please explain the reasons for your answer	Question 7: "I believe there is a good infrastructure to support research between academia, industry and the regulatory authorities"	Please explain the reasons for your answer	Question 8: "I believe making toxicology research data openly available with as few restrictions as possible in a timely and responsible manner would improve the impact and efficiency of toxicological research"	Please explain the reasons for your answer	Question 9: "When reading research publications, I consider whether there is a conflict of interest when assessing the validity of research"	Please explain the reasons for your answer	Question 10: "I believe the current system of peer review for research outputs is a fair and appropriate system"	Please explain the reasons for your answer	Question 11: "When peer reviewing research publications, I consider whether there is a conflict of interest when assessing the validity of research"	Please explain the reasons for your answer	Question 12: "I believe reviewers are often not sufficiently trained to adequately and fairly judge the merit, quality and impact of toxicology research"	Please explain the reasons for your answer	Question 13: "I believe double-blind peer review, where both reviewer and author are anonymised, is a good idea"	Please explain the reasons for your answer	Question 14a: "I believe open access publication, where articles are available free at source, is a good idea"	Please explain the reasons for your answer	Question 14b: Have you published research outputs using an open access route in the last two years?	Question 14c: If so, how was the cost for publication supported?
100	Disagree	it is virtually impossible to obtain research council funding for toxicology based research they are just not interested.	Strongly Disagree	see above	Strongly Agree	all of best work has come out of collaborative projects either within academia or involving industry collaboration	Strongly Agree	0	Conflicted	i agree but this results in large groups dominating funding and make its hard for smaller groups to establish themselves especially young scientists	Agree		Agree		Agree		Disagree		Agree		Disagree		Strongly Agree	this is very clear from some of the referees comments i received in the past	Agree		Agree		Yes	Institute or Employer	Yes
99	Disagree	funding is patchy	Strongly Disagree	Toxicology appears to be excluded not included	Strongly Agree	Toxicology requires different disciplines so we need to collaborate	Strongly Agree		Conflicted		Conflicted		Agree		Agree		Disagree		Agree		Disagree		Disagree		Conflicted		Conflicted		No		No
98	Conflicted		Disagree		Strongly Agree		Strongly Agree		Conflicted	Toxicology can be considered a largely pre-competitive activity	Conflicted	competition can drive innovation. but openness required for societal benefit	Agree		Strongly Agree		Agree		Agree		Strongly Agree		Conflicted		Agree		Agree		Yes	Institute or Employer	No
97	Conflicted	Not familiar with funding	Conflicted	Not familiar with funding compared to other disciplines.	Strongly Agree		Conflicted	I believe it is important for any discipline	Disagree	sometimes competition means that only hot topics get funded.	Disagree		Conflicted	The collaboration is present at the BTS congress and other meetings. Otherwise interactions can be limited especially with regulatory agencies.	Agree		Conflicted	Not always.	Conflicted	The peer review system may not always be unbiased. I also don't agree with the payment structure of publications.	Conflicted	As above	Disagree	That should not be the case but I can't judge this without knowing the reviewer per se.	Conflicted	Yes, in the first instance. However, sometimes a meeting might be a better way to resolve questions than written answers/questions.	Strongly Agree		No		Yes
96	Disagree	Doesn't seem to get enough input	Conflicted	Not sure as not my area	Strongly Agree	Good practice for consistency	Agree	It is a specialist area	Agree	Competition is good	Conflicted	Cant comment on others	Strongly Disagree	We struggle to get input and other voices	Conflicted	Depends on sensitivities	Conflicted	Not something Ive thought about	Conflicted	Cant comment on system	Conflicted	Never done it	Agree	Often they seem to miss point	Conflicted	Not sure what this means	Agree	yes, but again depends on area	No		Yes
95	Disagree	Not enough being done to drive discipline forward	Strongly Disagree	It always seems to be forgotten and somewhat hard to get funding for.	Agree	More hands etc,	Agree	Maybe Im biased, but this is how it works in our company	Agree	Competition with other disciplines..	Disagree	Think its important for all disciplines	Strongly Disagree	Much work to be done, but no means to do it	Agree	Although depends on the format and location	Disagree	Never really thought about it	Agree	Seems to work	Agree	important to be unbiased	Agree	Based on uninformed feedback received	Conflicted	Not sure its important or feasible	Agree	Data sharing is key	No		No
94	Agree		Conflicted		Strongly Agree		Conflicted		Conflicted		Conflicted		Conflicted		Agree		Disagree		Conflicted		Disagree		Conflicted		Strongly Agree		Strongly Agree		Yes	Institute or Employer	No
93	Strongly Disagree	We are screaming out for studies to be done.	Strongly Disagree	Its very hard to get research funded when badged as toxicology. We have to often use other terms such as chemical safety or human health etc.	Agree	Multi-skilled area needs many inputs.	Agree	So many things are hinged around this discipline..	Strongly Agree	Multi-skilled area needs many inputs.		Many areas are bounded by toxicology.	Strongly Disagree	All sides willing, but how would it be supported?	Agree	Can only help	Conflicted	Never really thought of it.	Conflicted	Not sure what in comparison to	Agree	Probably sub-consciously	Agree	poor and uninformed reviewers comments received all too often	Conflicted	Not sure there is a problem to fix	Agree	Can only be a good thing	Yes	Institute or Employer	Yes
92	Strongly Disagree	Its like the forgotten science, despite being front and central to many areas	Strongly Disagree	There is a lack of appreciation as to what Toxicology actually is, so its often missed off the list	Strongly Agree	More hands make light work..as they say	Strongly Agree	High requirement for mult-disciplinary working.	Strongly Agree	Healthy competition, to remain at forefront.	Agree	Partial agree, but depends on what compared to.	Strongly Disagree	There is a good degree of enthusiasm, but in reality there is little concrete infrastructure.	Agree	Yes, but depends on area and diversity of interest.	Agree	Part of being a good researcher	Agree	Depends on journal, but on the whole its okay	Strongly Agree	Its very important to stay neutral, as best you can	Agree	Difficult to say, but from the comments I receive back it is often clear that there is a lack of understanding.	Agree	Worth a try	Agree	On the whole yes, but not to the detriment of quality.	Yes	Competitive research award I received	Yes
91	Disagree		Strongly Disagree		Strongly Agree		Strongly Agree		Agree		Agree		Disagree		Agree		Agree		Disagree		Strongly Agree		Strongly Agree		Strongly Agree		Strongly Agree		Yes	Institute or Employer	Not educated to degree level
90	Conflicted		Conflicted	I don't have sufficient insight to be able to answer this question.	Strongly Agree		Agree	Hard to judge without more insight.	Conflicted	Conflicted because competition can drive innovation but do strongly believe that collaboration (e.g. as seen in the IQ MPS consortium where companies striving to jointly validate new technology) is also key	Conflicted	Not able to compare however, where animals are involved, collaboration rather than competition (i.e. minimizing any duplication) is important.	Conflicted		Strongly Agree		Disagree		Agree		Disagree				Conflicted		Strongly Agree		No		Yes
89	Strongly Disagree	Compared to other fields of science toxicology is vastly underfunded.	Disagree		Strongly Agree	Knowledge and ideas sharing makes best use of limited research resources.	Agree		Agree	In my role (as a regulatory toxicologist) I feel the only organisations willing to fund research are private companies looking to market their products.	Conflicted		Disagree	Organisations such as the BTS are vital to aid collaboration and dissemination of info.	Disagree	Funding often comes from private organisations wanting to protect their data.	Disagree	The public peer-review process should minimize conflict of interest.	Agree		Conflicted	N/A	Disagree		Agree		Agree	Where possible.	No	Not applicable	No
88	Disagree	There are less University departments focussed on Toxicology in the UK than there used to be.		Unable to answer this one as don't have enough knowledge	Agree	Toxicology is such a diverse subject that collaborations are important.	Strongly Agree		Conflicted		Conflicted		Conflicted	I think it depends on the individual authorities/ institutions	Agree	Toxicology is a diverse subject but also with many overlaps. If research data was openly available to all researchers I think it would improve efficiency.	Disagree		Agree	I think research needs to be peer reviewed by experts in this way before it is published, to ensure quality of publications.		N/A	Conflicted		Conflicted		Agree		No		Yes
87	Strongly Disagree	Not promoted as a genuine career for scientists. Very few Universities offering courses for students. Limited research efforts within Universities	Conflicted	No evidence that toxicology research is not treated fairly with respect to success through application. Perception is that certain disciplines and geographical locations get more than their fair share of research monies (e.g. oncology research and the SE of England) but is this simply a function of number of applications rather than bias?	Strongly Agree	Toxicology is a "support" discipline in that it is best aligned with the development of therapeutic approaches. As such this necessarily requires partnership between groups. Additionally, new technology approaches are often developed outside of the toxicology disciplines and again strong partnership is required in their application to toxicology.	Agree	As discussed above, toxicology is by definition a "support" discipline in that it is about understanding the impact of therapies (or more broadly cosmetics and chemicals) on patients (consumers/people) and cannot stand alone from these therapies. As such it can only progress in collaboration with groups who are developing such therapies.		I don't really understand this question...competition between who?		Still don't understand the question...competition between who?	Strongly Disagree	I don't see clear routes into bring these three important groups together to drive things forward.	Strongly Agree	Everyone benefits from this. Safety issues rarely benefit anyone and so they are "pre-competitive" in this sense. Also a perception of a "culture of secrecy" does damage to us all.	Conflicted	It is worth understanding who is publishing and what additional motivations they may have but ultimately good data should speak for itself and it is up to a reader to decide if there are holes in what is presented or if authors interpretations are not accurate.	Conflicted	It is the least worse system we have. See answer to the next question	Strongly Agree	I have on occasions refused to review due to potential conflicts of interest. I would like to think that all reviewers would do this, but I suspect that this may not always be the case. One of the weaknesses in the system is that reviewers are anonymous and so conflicts of interest are not obvious. They may also not be obvious to a reviewer until they agree to review a manuscript and can see the …	Conflicted	I have no evidence to suggest that this is true. Again I have declined to review if I do not believe I am sufficiently qualified to do so and I'm sure others do the same. However it is up to the reviewer to make this judgement (or the editors in sending to specific reviewers for review). It is true however that reviewers rarely receive training in how to review.	Strongly Agree	Who is publishing the research should not be a criterion for publication. The quality should be judged on the data and experimental design. The alternative of complete openness (where both reviewers and authors are known to each other) could limit fair assessment.	Strongly Agree	Could not agree more with this. Most/All research is funded by groups that are not the publishers. Publishers put up "pay walls" that limit access to research and hence make profit on research they had nothing to do with. For small businesses in particular pay-per-view on scientific publication is a major issue.	No	Not applicable	No
86	Disagree		Disagree		Agree		Agree	Data underpinning tox research may be "owned" by a different party to those who undertake novel hypothesis testing. For example, the in vivo data from humans or animals may belong to a drug company.	Disagree		Strongly Disagree		Conflicted		Agree		Conflicted	Regardless of whether there is a conflict of interest, I prefer papers where, as far as possible, the unadulterated data are shown that then allows me to formulates an independent interpretation and conclusion.	Agree		Agree	Rightly or wrongly, when peer reviewing publications where I perceive a conflict of interest, I am probably more insistent on approaching every sentence with the mindset of an auditor - Can the statement be fully supported backed up by data that is presented if it can't be supported, are more data required or should the statement be edited or removed?	Conflicted	I am not familiar enough with reviewing panel membership to know. I think TIME and ENERGY and the COST of that (free) time can be a factor. It can take AGES to formulate constructive comments on complex documents	Agree		Strongly Agree	I am an independent consultant. Without the licenses available to academic groups and big companies, I feel hamstrung.	No		No
85	Disagree	Neither Universities nor Industry are adequately resourcing tox research today.	Conflicted		Strongly Agree	Toxicology research needs multidisciplinary techniques and perspectives that rarely exist in single institution. Excellence in specific areas need to be brought together.	Strongly Agree	Same response	Agree	To a certain extent. Proposals need to make a valuable contribution. Competition for grants, funding, staff best way to ensure that.	Disagree	Not convinced tox is a special case in this regard.	Agree	Agree especially between industry and Regulators but could be much better with respect to Universities.	Strongly Agree	I see few reasons to keep this confidential.	Strongly Agree		Agree		Conflicted		Conflicted		Strongly Agree	True meritocracy	Strongly Agree	Best way to ensure greatest dissemination.			Yes
84	Conflicted	Neglected area in the entire world lately. With appropriate resources, the number of the failed clinical trials could be reduced significantly imo.	Agree	We are in a transition state economically at the moment, so hard to answer without any insight.	Strongly Agree	Sharing data and experience is key.	Agree	As I mentioned, sharing information is key.	Conflicted	Please, define competition next time. For fundings, workforce...?	Conflicted	Competition is the part of the market, so it is essential on a particulat level.	Disagree	Sharing data and information could be more "accurate". (According to my own experience.)	Strongly Agree	Although, generates many questions and concerns.	Strongly Agree		Conflicted	No insight in the field, so I can`t provide valid answer.	Strongly Agree		Agree		Agree	Interesting idea. I would support it.	Agree		No		Not educated to degree level
83	Conflicted	As an essential area of research, it should receive greater attention and financial resources.	Conflicted	I found that when it is about the funding of a toxicology research these organisations prefer the support of other areas of science.	Strongly Agree	Collaboration is a substantial element of creating a modern toxicology for the century and ground its future.	Strongly Agree	As they say, 'physics is the basic of science' then 'toxicology is the basic of a sustainable future for people and everything around them.' No other area of biomedical or medical sciences will be able to safely exist without it. To create this fundamental background, collaboration is essential.	Agree	However, it depends. Competition for its existence or for its development?	Agree	In a meaningful manner.	Conflicted		Strongly Agree		Agree		Conflicted		Agree		Conflicted		Agree		Agree			Not applicable	Yes
82	Agree		Agree		Strongly Agree		Agree		Agree		Agree		Disagree		Conflicted		Strongly Agree		Conflicted		Agree		Strongly Agree		Conflicted	This will slow down the process and hinder publications.	Agree		Yes	Funded personally	Yes
81	Disagree		Conflicted		Strongly Agree		Strongly Agree		Agree		Disagree		Agree		Strongly Agree		Agree		Agree		Agree		Disagree		Agree		Conflicted		No	Not applicable	No
80	Conflicted		Conflicted		Strongly Agree		Strongly Agree		Disagree		Disagree		Conflicted		Agree		Agree		Agree		Agree		Conflicted		Agree		Strongly Agree		No	Not applicable	Yes
79	Agree		Conflicted		Strongly Agree		Strongly Agree		Conflicted		Conflicted		Disagree		Agree		Agree		Agree		Agree		Agree		Agree		Strongly Agree		No		Yes
78	Disagree	Certain areas could do with more investment.	Conflicted	I'm not really sure.	Strongly Agree	it's the most efficient way surely?	Strongly Agree	Same as above	Conflicted	I think working together would be best, but competition can introduce new ideas.	Conflicted	I don't know.	Conflicted	I don't really know.	Agree	The overall literature is the most important aspect in my field (Food policy)	Strongly Agree		Agree		Strongly Agree		Conflicted	It depends on the reviewer.	Agree		Agree		No		Yes
77	Agree	Attending conferences it seems to me that British research activity is well represented.	Agree		Strongly Agree		Strongly Agree		Conflicted	I do not have enough experience to judge this	Conflicted	see previous answer	Agree		Agree		Agree		Conflicted		Conflicted	I am not involved in peer review	Conflicted	I do not have enough experience to answer this	Agree		Disagree			Not applicable	Not applicable
76	Disagree	As a early career researcher, I have noticed that any toxicology-related education or career advice have been effectively absent throughout my undergraduate and postgraduate studies	Conflicted		Agree		Agree	With toxicology being presented as a 'niche' choice within natural sciences education, I think it is important to create avenues for people from other disciplines (including Chemistry and Computer science) to get involved in toxicology research	Conflicted		Conflicted		Disagree		Strongly Agree	I think particularly the fact that a significant amount of the toxicity testing data in animals is proprietary and is often behind the paywall results in multiple tests being repeated and generally impedes e.g. validation of in vitro toxicity models	Agree		Conflicted		Conflicted		Conflicted		Conflicted		Strongly Agree		No		No
75	Conflicted		Disagree		Strongly Agree		Strongly Agree		Conflicted		Conflicted		Disagree		Agree		Agree		Agree		Agree		Conflicted		Conflicted		Agree		No	Collaborator or industry sponsor	Yes
74	Disagree	Little funding available for clinical research. Why would drug companies want to identify probems!	Conflicted		Agree		Agree		Disagree		Disagree		Disagree		Agree		Strongly Agree		Conflicted		Agree		Strongly Agree		Agree	But not always possible! The nature of the work may identify the researcher.	Strongly Agree		No		No
73	Conflicted		Conflicted		Strongly Agree		Strongly Agree		Conflicted		Conflicted		Agree		Strongly Agree		Strongly Agree		Agree		Strongly Agree		Conflicted		Strongly Agree		Strongly Agree		No		No
72	Conflicted	Now retired therefore cannot assess the current situation	Conflicted	See above	Strongly Agree	Obviously the optimal approach	Conflicted	Not in a position to judge	Disagree	Competition is often directly opposed to collaboration	Disagree	See above	Conflicted	Now retired therefore cannot assess the current situation	Conflicted	Premise difficult to understand	Strongly Agree	Essential in any aspects of safety data generation	Conflicted	Much in the press to suggest that peer reviewing is not always objective	Agree	My experience in the past	Agree	Especially reviewers of papers covering several disciplines of, say, several non clinical aspects of drug development	Agree	Sounds good in principle	Agree	Transparency must be good from first principles	No	Not applicable	No
71	Strongly Disagree		Disagree		Strongly Agree		Agree		Agree		Agree		Disagree		Conflicted		Strongly Agree		Agree		Strongly Agree		Conflicted		Agree		Agree		Yes	Not applicable	No
70	Conflicted		Agree		Agree		Conflicted		Disagree		Disagree		Agree		Agree		Agree		Agree		Disagree		Conflicted		Strongly Agree		Strongly Agree		No	Not applicable	No
69	Disagree	While pollutant chemicals/pharms., etc. are of increasing importance both training and research has shrunk considerably in the last 10-20 years.	Disagree	There doesn't appear to be any strong funding for toxicology centrally.	Strongly Agree	Personally I have collaborated in both research and consultancy especially in projects funded by the EU! This is likely to almost disappear.	Conflicted	Important in all science with different people bringing different skills and thinking.	Conflicted	I believe this to be true in times past but not sure how much tox research takes place in the UK at present.	Conflicted	Not sure how competitive tox research is in UK compared to other medical/biological disciplines.	Disagree	UK has lost most of its training (MSc) programmes lately. Most of the regulatory drivers have come from the EU so perhaps UK will have to build up some expertise again!	Agree	Tox unlike many other disciplines has a wide commercial interest, which may affect much data. However, the public and other scientists should have as much availability as possible as it may affect their health as well as their research.	Conflicted	I believe most published to be available to be assessed by the reader. However, not sure about the data which are not published and whether there is a conflict of interest there.	Conflicted	Scientists are just people with prejudices both professional and personal! Most peer review appears fair especially with right of reply and change, but this requires a firm editor.	Disagree	I feel I can assess the validity of data without assessing the author's opinions	Conflicted	It is up to the editor to chose appropriate reviewers and there is generally the right of reply if there is disagreement.	Agree	The reviewer is generally anonymised while a glimpse at the ref list usually indicates the author group so may be of little use!	Agree	Always good to have free publications but a strong review programme is also required a nd thi is not always the case with open access.	No		No
68	Disagree	Underfunded and too few toxicologists	Disagree	Often not a priority	Strongly Agree	Collaborative research is the only way forward	Strongly Agree	As above	Agree	Up to a point and should not impede the research programme		As above	Conflicted	Only in some cases and where the links exist	Strongly Agree	I support open access to the majority of research publications	Strongly Agree	Essential	Agree	Mostly OK	Strongly Agree	Always	Conflicted	Depends on who choses the reviewers	Strongly Agree	Stops bias hopefully	Strongly Agree	As above	Yes	Institute or Employer	No
67		As a desk-based consultant never seeking research funding I have no idea		see previous comment	Agree	It is a silly question, and the obvious answer needs no explanation		See my first comment, and thus I have no way of comparing tox with other disciplines	Disagree	Doesn't collaboration, which I earlier was in favour of, argue against competition	Conflicted	Conflicted in this context means I don't know	Conflicted	ditto	Strongly Agree	With such a ridiculously loaded question what other answer is possible	Strongly Agree	In such a soft science of course conflict of interest will be an important consideration	Conflicted	I have never been involved in the peer review process and cannot judge its fairness. A lot of very poor papers are being published in what are supposedly top journals so clearly the peer review process as presently constituted isn't working brilliantly		I have never been asked to peer review any publication so have no idea.	Agree	see answer to Q10.	Agree	It should be the message quality not the prestige of the messenger that dictates the feedback	Strongly Agree	Most publishers bring very little value added to the table,and are exploiting the voluntary efforts of others to make large profits	No	Not applicable	No
66	Strongly Disagree	Academic centres have reduced, government spending over a long period has been minimal, pharmaceutical companies have relocated or contracted, CRO's do not have development of the science at their core purpose.	Strongly Disagree	It took huge effort to get the ITTP programme to work - but it is very limited in comparison to other sectors and review panels rarely have toxicologists evaluating the merit of applications for funding.	Strongly Agree	Industry is to reluctant to share data - it is ethically dubious to allow animal use in projects that others have already established are not viable but there is no mechanism to ensure the learning is mandatory and applied. Collaborative academic research is compromised by the drive for high impact publication so competition becomes more important than collaboration.	Strongly Agree	Competitive advantage is possible through improved safety profile but is secondary to efficacy. The issues in toxicology are multi disciplinary and structure activity difficult to establish - data sharing should be encouraged and similar to clinical trial disclosure any study involving animals should be accessible by all within a given timeframe.	Conflicted	It is good to have competition to ensure high quality training and data generation. Competition that drives secrecy rather than collaboration inhibits overall progress. For example - everyone now screens for hERG activity, no single group benefits but everyone benefits. If the screen was restricted to maintain a competitive advantage it would potentially benefit an individual company but the over…	Strongly Disagree	Issues are to complex for a single company or research group to solve. It needs open access and even those things where a high investment is made the benefits to the patient population is only achievable if all projects can apply the technology.	Strongly Disagree	The BTS is a good means but there is no mandate to collaborate - on any of the parties. Academia are judged on impact factor of publications, regulators but safe approvals (few withdrawals and serious ADR's) and industry by profit. It needs government level commitment to say these competing objectives should be secondary to patient benefit.	Strongly Agree	See above. Allowing others to potentially inflict harm when a liability is known is unethical. Open access will improve collaboration and improve mechanistic understanding of complex toxicities and human relevance.	Disagree	Most publications are peer reviewed so what gets into the public domain can largely be trusted (not all!) - the issue is getting it into to public domain and in formats where is can be used.	Agree	It has stood the test of time but clearly depends on the quality of the reviewers selected. A tension will always exist as reviewers need to know the subject area but in doing so may in the current system be direct competitors.	Strongly Agree	I would decline to review if there was a strong conflict of interest. In reviewing the interests of the authors there is less concern as the data presented should support or otherwise the conclusions drawn.	Conflicted	It is mixed. Some are excellent. Some very dismissive and some simply do not understand the science.	Agree	It avoids the knowledge of who is involved having preconceived ideas and allows focus on the data presented.	Strongly Agree	The value of publications is to improve patient safety but this is often compromised by needs for journals to make money.	No		No
65	Conflicted		Conflicted		Agree		Agree		Agree		Conflicted		Conflicted		Conflicted		Agree		Agree		Agree		Conflicted		Agree		Agree		No		No
64	Agree		Disagree	I feel that toxicology is the poor sister in medical research	Agree		Strongly Agree		Disagree		Disagree		Conflicted	It could be improved but active high profile collaborations, we have lost BIBRA and CTL both drove collaborations	Agree		Agree		Strongly Agree		Agree		Conflicted	some are and some are not	Disagree	collaboration is the best approach	Disagree	science relies on peer review for confidence and acceptance, it is part of the research method	No	Not applicable	Yes
63	Conflicted		Disagree		Conflicted		Conflicted		Agree		Agree		Disagree		Conflicted		Agree		Conflicted		Agree		Disagree		Disagree		Agree		No		No
62	Disagree	I believe that more effort needs to go towards cross disciplinary research e.g. between toxicology, DMPK, mathematicians, in silico modelling. The objective being to foster collaboration and drive forward a change in our approach.	Agree	Following my previous point; it is not only down to toxicology but also prospective partners to look into collaborations.	Strongly Agree		Strongly Agree	However, please see my point above - it takes all partners to be willing participants.	Agree	Constructive tension is good destructive competition is bad.	Strongly Agree		Agree		Strongly Agree		Agree		Agree		Agree		Strongly Agree		Agree		Strongly Agree		Yes	Institute or Employer	No
61	Strongly Disagree	Very difficult to find support	Strongly Disagree	Often not even mentioned, apart from Nc3Rs	Strongly Agree	Working together addresses the big questions	Strongly Agree	Many skills are needed	Agree	Healthy competition is required across all disciplines	Agree	To keep it focused and current	Strongly Disagree	There should be, but there is not. Lots of hot air, but no action	Strongly Agree	Helps advance the field without repetition	Agree	Part and parcel of reading the paper	Strongly Agree	It works, so don't fiddle with it	Strongly Agree	Part of being professional	Agree	Too many people think they can just adapt other areas of knowledge	Disagree	Knowing who the author and reviewer are takes the secrecy out of it, and allows a fair review	Strongly Agree	As long as quality doesnt suffer	No		No
60	Disagree	Toxicology is largely a forgotten science and is funded on the back of other types of research, or supported by industry	Strongly Disagree	Funding is still focused on the 'blue sky' arena and is not been resourced adequately for the applied sciences. Toxicology is often not even mentioned.	Strongly Agree	The field is too large for one group to provide significant impact. Many skills are needed together	Agree	The skill base is spread across different areas.	Agree	Equal competition against other disciplines.	Agree	Equal opportunities are required, with toxicology often not even on the table.	Disagree	There is willing, but the infrastructure is not established.	Agree	Sharing to avoid duplication of effort	Agree	Always have to be realistic	Strongly Agree	It works well	Agree	As a reviewer you should be impartial	Agree	Often principles of other disciplines are incorrectly applied	Disagree	Blinding of author doesn't add anything	Agree	As long as it doesn't compromise quality	Yes	Institute or Employer	No
59	Strongly Disagree	There is a lack of training in the Universities and in particular there is a lack of training in the risk assessment, testing and regulation sectors. Furthermore a number practicing in these sectors have a good knowledge of regulation but little of the laboratory or molecular techniques that underpin the science. There is an urgent need for polymath practitioners of toxicology who can bridge the …	Strongly Disagree	Toxicology is an applied science and has been typically less funded overall and held to the same outputs as purely academic science which is an unrealistic expectation.	Strongly Agree	Toxicology is multidisciplinary and requires collaboration across all sectors.	Strongly Agree	See above	Agree	Some competition is helpful but not when it underpins collaboration. This is a delicate balance that requires management.	Disagree	It is no more important in Toxicology then elsewhere	Disagree	No there is not. Regulatory authorities should include broader government where there appears to be a little academic recognition of the work undertaken here. For understandable reasons the main focus of academic collaborative work is industry but it is not helpful to the overall development of the science.	Strongly Agree	Open access to data is always preferable	Agree	Yes this always has to be considered and is part of any systematic review.	Agree	Largely agree though journals prefer basic research which is not in the best interests of the development of toxicology.	Strongly Agree	Yes - always consider conflicts in reviewing.	Disagree	Most reviewers are I believe fair. There are always some conflicts of beliefs of conflicts but no worse in Toxicology than elsewhere.	Strongly Disagree	I don't see any reason to change the current system	Strongly Agree	Yes and required in most cases	Yes	Institute or Employer	Yes
58	Agree	I believe most researchers resource toxicology research because the first thing on most researchers mind is the safety of the substance of interest.	Agree	I believe funding bodies mostly release funding with respect to toxicity study	Agree		Agree		Conflicted		Conflicted		Disagree		Agree		Conflicted		Conflicted		Conflicted		Conflicted		Agree		Conflicted		No	Not applicable	Yes
57	Conflicted	adequately resourced 'in pockets' but more due to history than a strategic plan	Disagree	most toxicology research funded by very few funding bodies	Strongly Agree	best way to do science!! even more important when resources are constrained ...	Strongly Agree	needs to be highly multi-disciplinary	Agree	necessary to drive high performance / output	Disagree	thinks it's the same for all disciplines	Conflicted	where it works well it's about networks & personal relationships rather than infrastructure - depends on individuals' commitment to making something happen ...	Agree	transparency is essential, even more so when the science underpins public health decisions	Agree	may explain focus / positioning for data interpretation	Conflicted	works well in some situations, probably not in others	Agree	important to check that data are not explained in a potentially 'biased' manner	Agree	it can be difficult to get the time of the first-choice experts; as the research becomes more multi-disciplinary and incorporates mathematical / computational approaches, there is a very limited pool of active reviewers suitably qualified	Conflicted	shouldn't be necessary but have come across situations where this would have been fairer	Agree	encourages more widespread readership	No		Yes
56	Conflicted	Tox Unit yes, the Univ sector? I doubt it	Conflicted	its so difficult to make such statements	Strongly Agree		Disagree	other disciplines are the same	Agree		Conflicted		Agree		Agree		Agree		Agree		Agree		Conflicted	don't know. Why this question?	Agree		Agree		No	Not applicable	No
55	Disagree	Although there is a fair amount of toxicology research underway in the UK is s clearly not as well resourced as toxicology research elsewhere in the world such as the USA.	Agree		Agree	Mainly agree, but I would point out that in some cases toxicology research may be very specific to a particular problem encountered in a particular product development such as a new pharmaceutical or agrochemical. In such situation the skill base available to resolve the problem is what matters rather than formal collaboration.	Disagree	I do not think that there is any logical reason why collaboration in toxicology research would be anymore important in toxicology versus any other discipline.	Agree	In any field of human endeavour competition tends to improve performance and this is as true in science as it is in other areas.	Disagree	I do not think that there is any logical reason why collaboration in toxicology research would be anymore important in toxicology versus any other discipline.	Conflicted		Conflicted	There are clearly advantages and disadvantages to this and I don't feel I can give a definitive answer. The traditional method of paid for access clearly ensures the quality of the information. Open access has the issue as to whether the resources are available to fully peer review and check papers and hence there will always be a quality question.	Agree		Agree		Conflicted	I do not peer review papers.	Conflicted	I'm not able to comment on this as I do not have enough experience of the process.	Strongly Agree	This would be a good idea as there will always be some bias introduced in the minds of the reviewers based on origins of the research. I would point out that this method is no foolproof as in a small field like toxicology it may be possible for the reviewers to guess the origins of the research.	Agree	See my answer to question 8. There is a benefit to open access but it is not completely clear-cut.	No		Yes
54	Strongly Disagree	It is not considered competitive against clinical research	Strongly Disagree	Putting the term toxicology on a grant application is likely to lead to reject	Agree	Genuine collaboration is good for all disciplines	Disagree	There is no special reason why collaboration should be important for toxicology	Strongly Agree		Strongly Agree		Disagree	No real funding stream available	Agree		Disagree		Agree	Its fraught with problems but remains the best approach	Agree		Agree	I am an associate editor for a journal and see a range of qualities in the review process	Agree	Reduces conflict. i also think reviewers should be paid for their work in this respect. Most journals exist to make a profit!	Agree	Its difficult to say it is a bad idea, but of course, the RC are paying for it - which means less money for research	Yes	Competitive research award I received	No
53	Disagree		Disagree		Strongly Agree		Strongly Agree		Conflicted		Conflicted		Disagree	Academia is often not sitting at the table with the regulators and industrialists to ensure that there is a holistic approach to education and training	Agree		Agree		Agree		Agree		Disagree		Disagree		Agree		Yes	Institute or Employer	Yes
52	Disagree	No enough Universities offering (post)graduate courses in Tox. Therefore not enough Ph.D places or candidates for places.	Disagree	See above.	Strongly Agree		Strongly Agree		Conflicted		Conflicted		Disagree	There are not enough training locations for Tox in the UK. Only Birmingham offers a full-time and part-time MSc course. The community is still reeling from the closure of the Surrey course. The subject needs greater visibility especially in the light of the Novichock situation.	Strongly Agree		Strongly Agree	In Tox publications on e.g. chemical 'X' the full specification (purity, isomer ratio, impurity profile) of what is tested is rarely/never included in the publication yet such publications using randomly sourced chemical 'X' are often aggressively cited by EU MS agencies as evidence that chemical 'X' from a commercial source (i.e. not the source tested) is e.g. mutagenic or some other bad news bi…		Negative data are rarely approved by publication yet negative data are still 'results'.	Conflicted		Conflicted	Depends....conflicts and prejudices exist in academia as much as elsewhere in society.	Strongly Agree		Strongly Agree			Collaborator or industry sponsor	Yes
51	Conflicted		Conflicted		Agree		Agree		Agree		Agree		Agree		Agree		Agree		Agree		Agree		Agree		Conflicted		Agree		Yes	Institute or Employer	No
50	Disagree	As an student hoping to enrol on a toxicology associated PhD, my experience in looking for such opportunities suggests that projects of a toxicological nature are far less common than those in alternative biological/pharmaceutical areas.	Conflicted		Strongly Agree		Agree		Agree		Agree		Conflicted		Agree		Conflicted		Agree		Agree		Conflicted		Strongly Agree		Conflicted				Yes
49	Strongly Disagree	University training places at MSc level for professional toxicologist is nowhere near what is required for UK industry. If the UK is no longer part of the EU programmes, then a very much higher level of research spending is required to remain as a significant country on the world stage.	Disagree	Toxicology appears to be regarded as the responsibility of Industry, and is not allocated the funding that would be commensurate with public expectations on protecting the population.	Strongly Agree	In over 36 years of working in Toxicology, almost all research that I consider as being productive has been collaborative.	Strongly Agree	Good toxicology research protects the population. Narrow research groups tend to be focused on funding rather than true safety of the population. Wider collaboration ensures a more balanced approach to risk, hazard and human/environmental safety.	Disagree	Unlike areas like discovery of a better mouse-trap or fuel cell, toxicology research needs to be focused on a consensus for what factors are important for toxicology assessment, and what new methods can be implemented across industry, and interpreted suitable by regulators.	Strongly Disagree	Competition can be good when the aim is to make a new product. But anything new in toxicology needs to be applicable to a wide range of people, establishments, industries etc. It also has to be relevant for regulators, and needs to be accepted internationally.	Conflicted	I have experience of when the different areas have worked well together. But this has been down to the good will of the individuals concerned, rather than anything that stems from government funded actions.	Conflicted	Probably most toxicology work performed is made on potentially commercial products. If all data became available to everyone, then some industries would not invest in the work. However, it would be true that all publicly funded toxicology should be available to all, and, within certain constraints, the toxicology data on commercially available substances should be available. Currently if 6 studie…	Agree	For academic research, often the published information will affect the future funding of the authors, and the quality control is not formally and independently managed. Most testing of commercial chemicals is made in GLP facilities (very often in independent CROs) where it is not possible to produce highly biased reports. Hence the formal testing of pesticides etc is more reliable than a universi…	Conflicted	I make peer reviews for leading toxicology journals. I have seen peer reviewers make very poor judgements on what should be published, but I also see peer reviewers who take great care to ensure the system works. Many journals do not have an adequate peer review system, but other have an excellent system. So there is no correct answer to the question.	Agree	I do consider it certainly, which affects how much depth I go into in checking the publication. For example, I have rejected a publication extolling the safety of plant extract from Asia, when I found the references did not support the author (who would probably reap rewards if the product gained approval). But the GLP status of the work carried out is an important factor in judging how much conf…	Agree	As a peer reviewer of one of the important toxicology journals, I have no training from the publisher. In my job I peer review many reports a day, so I have a lot of practice, which could be called training. But I do not know how much that counts when the Editor selects me to review a publication.	Conflicted	The peer reviewer is usually best kept 'blind'. But as a reviewer, I do find it useful to know what other publications the author made, often the work being reviewed is part of, or related to other wok by the same author.	Agree	I agree very much with Open Access. But all publications have to be funded, and "vanity" publications (where the author or their sponsor, pays for publication) is a bad thing and the articles can be very biased and designed to deceive the public. Particularly when the subject is a new skin cream, diet or beauty product; but equally it can apply to any area, many articles showing that smoking is s…	No	Not applicable	Yes
48	Strongly Disagree	I am personally involved in the Toxicology MSc at Birmingham and help teach on the University of Surrey’s MSc Toxicology courses. I know that the research councils do not see Toxicology research as a priority	Strongly Disagree	See above	Strongly Agree	I worked for a pharmaceutical company for 13 years and for an agrochemical and industrial chemicals company for an additional 20 years. The involvement of industry helps to keep academic research relevant to the industry	Strongly Agree	Toxicology is essentially an applied science and the majority of problems in toxicology arise through industrial mishaps or developmental problems associated with chemical development and use	Conflicted	I’m not sure I fully understand the implications of this question which exlains my ambiguous answer	Conflicted	As above	Disagree	Academic Toxicology must be at an all time low when compared to that existing in the last 50 years. Brexit is unlikely to increase regulatory opportunities but you never know.	Strongly Agree	This is tricky to achieve in practice since confidentiality often inhibits rhe timely appearance of data and in some cases prevents the data from ever appearing.	Strongly Agree	This applies to all areas of science not just toxicology. Simply because a paper is authored by an academic doesn’t remove the need for a statement of conflict of interest since academics need positive data to generate grant money and while we always like to believe that data interpretation is unbiased this is far from the case in practice	Agree	It is a practical and pragmatic system but it far from perfect as anyone with experience of submitting and reviewing manuscripts will testify	Strongly Agree	Because I understand the pressures to publish, this being especially so for academics	Agree	I was editor of a pathology journal for 6 years and I know that with the best will in the world teviewers need specific guidance as to what is expecred of them during the review	Strongly Agree	This goes some way to avoiding both positive and negative bias (that might occur if the reviewer knows the author personally	Strongly Agree	While I appreciate the need for journals to make money for the sake of exposure and the use of the most relevant literature experimenters need free access to the right articles. The cost of articles can be prohibitive especially where a laboratory may be small or in a part of the world where money is short		Collaborator or industry sponsor	Yes
47	Disagree	Inadequate funding	Conflicted	Too much emphasis on institutions and not enough on the content of proposals	Strongly Agree		Strongly Agree		Agree		Disagree	Necessary in all research.	Disagree		Strongly Agree		Agree		Strongly Agree		Strongly Disagree	I consider the merits of the research.	Strongly Disagree		Agree		Strongly Agree		No		No
46	Conflicted	It depends which sector. If mandatory (pharma, vet meds, food additives) then yes - or driven by REACH - then perhaps. Not so for basic tox research.	Disagree	I don't think basic toxicology is seen as a mainline scientific endeavour compared to to other disciplines	Strongly Agree	sharing of skills is essential for such a wide-ranging discipline.	Strongly Agree	Toxicology is a constellation of topics, sciences and skills and collaboration to share these is essential.	Disagree	I think collaboration is more important than competition. The think the belief that competition brings out the best science is misplaced.	Strongly Disagree	See above answers	Disagree	There may be hot-spots for this but nowadays, it seems worse that previously. Much has to do with reduced funding for all three stakeholders and the reduction in staff in all 3 groups to take this forward.	Agree	I this self-evident - but not sure how effective the impact would be.	Disagree	I look at the quality of the research alone and trust that the editor and reviewers have taken care of this. I believe all researchers have conflicts of interest - declared or otherwise - even pure academics!	Conflicted	I think it is generally fine though it seems harder to find reviewers through time pressures and lack of recognition by employers that this is a "worthy" activity.	Strongly Disagree	No - I simply look at the quality of the manuscript and make sure the conclusions are consistent with the study findings and discussion of the results and field in general. I do this also where there is no declared CoI.	Agree	Yes - this can happen. As our US colleagues say - it can be a bit of a crap-shoot.	Conflicted	In general I am happy to be identified when I submit a paper or when reviewing a paper. But I do not object strongly to double or single blind systems. One has to trust colleagues ti behave well regardless of the system. Is some scientists are going to behave unprofessionally of unfairly, sadly they will do this sugarless of the system.	Strongly Agree	Self evident - especially to those who do not have ready access to a good library.		I wanted to tick both the two first boxes but was unable to do so.	No
45	Disagree		Disagree		Agree		Strongly Agree		Disagree		Disagree		Disagree		Agree		Agree		Agree		Agree		Agree		Agree		Agree		Yes	Not applicable	No
44	Conflicted	I think there are resources available, but perhaps a greater issue is the lack of human resource (appeal to students in starting out in a career in toxicology) and a general lack of funding from the public sector (ideological with the current administration)	Agree		Strongly Agree	Toxicology is and has always been a multidisciplinary activity, hence MUST be collaborative.	Strongly Agree	Toxicology is and has always been a multidisciplinary activity, hence MUST be collaborative.	Strongly Disagree	Competition discourages collaboration.	Strongly Disagree		Agree	there is always room to improve	Agree	It's important to remember that some toxicology data has a commercial value, so making data openly available should be encouraged but not mandatory.	Strongly Agree	This is fundamental to critical review of any science.	Strongly Disagree	It's pretty much useless. It's a lottery... journal editors can have their own agenda, select inappropriate peer reviewers who may also have their own agenda, or not be sufficiently competent to review the publication. Particularly so now where there are so many different approaches that can be used to investigate chemical safety.	Strongly Agree	This is important, it should not preclude publication of good research, but peer reviewers should be very confident that the findings are genuine and high quality.	Conflicted	Who can truly judge impact? Surely this needs a crystal ball?	Conflicted	It seems right to focus the reviewer on being confident that there is no evidence of bias when there is a potential conflict of interest; however, partial blinding (e.g. telling the reviewer that the editor has concerns about potential a conflict of interest, but not stating who or what that is) would lead to greater and more objective scrutiny since the reviewer would not necessarily know which …	Agree	Although, since publication fees are paid up front, this must not lead to vanity publishing or precluding publication of good quality academic texts where research funds may not be able to absorb the increased publication costs.	Yes	Collaborator or industry sponsor	Yes
43	Disagree	When you look at the ToxCast/Tox21 activities in the US that are really transforming toxicology and that dominate all global Tox meetings at the moment - where is the UK research that is complementing this?	Disagree	BBSRC do not actively embrace toxicology, but fund more of the background science that ultimately feeds into toxicology. NC3Rs has a more broad remit	Strongly Agree	Toxicology is increasingly a multidisciplinary science (mechanistic chemistry, informatics, complex cell culture, molecular biology, mathematical modelling, transcriptomics etc etc) collaboration between centre of excellence in these areas is essential to drive toxicology forwards	Agree		Disagree	I think toxicology is about collaborative science	Strongly Disagree		Conflicted	There are good industry/academic links, but we should harness these links more broadly rather than company by company	Strongly Agree		Disagree	I believe that if work is adequately conducted, reported and reviewed that I can judge the quality of the research	Agree		Conflicted	I will take into account a conflict of interest, but the research should stand for itself	Agree		Agree		Strongly Agree		Yes	Institute or Employer	No
42	Strongly Agree	There are many resources online for getting information about toxicological testing and findings from work done in the UK	Agree	I believe that more funding towards toxicology research is needed	Strongly Agree	Collaborative research involving different disciplines would bring out more science in Toxiciology	Strongly Agree	Collaborative research involving different disciplines would bring out more science in Toxiciology	Conflicted	Am not sure who we would be competing with to act as a driver but relevance would motivate toxicologists to do more	Agree	There is a need to harness the various disciplines in Toxicology as way of expanding this field just like other fields such as medicine.	Conflicted	There could be more done to support this.	Strongly Agree	Toxicology is a growing field and the only way to improve the impact of research findings is to share widely and get more interests	Strongly Agree	This a common requirement nowadays and checking that there is no conflict of interest gives the publications more weight	Conflicted	Am not familiar with the current system	Strongly Agree	I make sure that publications are in line with expected research protocols and methods	Conflicted	This would apply in other researches as well	Conflicted	There is no evidence of such methods improving reviews. Reviewers sometimes don't really know authors and may just be interested in the topic	Strongly Agree	This allows growing scientists to access useful information	No	Not applicable	Yes
41	Disagree	I think there is a lack of toxicological research carried out. More institutions could conduct more research	Disagree	Looking for funding, there is limited places to apply for the areas of research I would like to conduct.	Strongly Agree	Most institutions do not have every piece of equipment needed to carry out all research. Collaboration leads to sharing not only equipment but also knowledge	Agree	Would lead to more awareness and more knowledge transfer.	Agree	Competition is healthy in any area	Disagree	I don't think competition should be the main reason for driving research	Conflicted	In some instances I agree, however more collaboration between more academic departments and institutes would be welcome instead of just a few working with industry.	Strongly Agree	Data sharing is very important, especially if it involves animal work.	Agree	Conflict of interest could lead to bias	Conflicted	Reviewed by experts in the field is helpful, however those experts may be stuck in their ways and not agree with research developments moving away from their own ideas	Agree	Biased feedback could result.	Agree	Having reviewed an article myself, I would have liked more guidance about how to give feedback and what I should look for in an article.	Conflicted	It is good in a way as no one can be biased against an author or reviewer. However, Needing feedback from the reviewer may not be possible in this instance.	Agree	As a PhD student access to papers that have a fee are not possible as it would use a large part of my budget designated for labwork.	Yes	Collaborator or industry sponsor	Yes
40	Conflicted	Industrial toxicology research is underfunded and understaffed. Unfortunately academic training in toxicology is not necessarily a good training ground for industry toxicologists, and whilst underfunded I am not sure additional funding is warranted or would address the need for toxicologists in industry.	Disagree	Toxicology research is not a particularly strong field of academic research.	Conflicted	Openness and collaboration between companies would be beneficial. I am less convinced about the relevance to academic research for industry. It should not be forgotten that toxicology is largely an applied science.	Disagree		Disagree		Disagree		Strongly Disagree	More could be done to link up academia and industry. As it stands there is a mismatch between academic toxicology research and industry interests.	Agree	Whilst I agree, this will be fraught with issues due to conflict of interest between academia and industry.	Agree		Conflicted		Disagree		Agree		Agree		Strongly Agree		Yes	Institute or Employer	No
39	Conflicted	Resources can always be improved.	Agree	All research councils will have a specific research remit and many will support work that promotes the 3Rs, and in silico and in vitro research.	Strongly Agree	Collaboration within disciplines will be important for advancing research in toxicology (e.g. preventing unnecessary work being carried out). Thanks to advances in techniques and methods (e.g. ‘omics’ and in-silico modelling), the need for collaboration across disciplines becomes increasingly important, for example, between wet lab scientists, statisticians and computer scientists, etc.	Agree	Although I believe collaboration is important in all disciplines, it is especially important in toxicology due to different regulations across the world, e.g. USA, Europe, and China.	Conflicted	Competition has the benefit of driving research but can also prevent collaboration between research groups and introduce conflicts of interest, which can potentially lead to bad science (i.e. cutting corners).	Conflicted		Agree	I believe there is often collaboration between these.	Strongly Agree	This would make toxicology research more efficient. Having to pay to read publication can result in missed data, which could have a big influence on your own research. Likewise, using data from an abstract only can lead to misinterpretation of the findings.	Strongly Agree	it is important to consider whether there are any factors that may bias the findings or the authors interpretation of them.	Disagree	The process should be double blinded so that the reviewers do not know the authors and their University.	Conflicted	I haven’t peer-reviewed a publication yet.	Conflicted	I can’t make inferences on the reviewers training, but the panel of reviewers should include experts in the field. Scientists from other fields may also be beneficial alongside.	Strongly Agree	This removes bias, as far as is reasonably possible.	Strongly Agree	Makes data accessible to everyone.	No	Not applicable	Yes
38	Disagree	Especially at the academic level toxicology teaching should be strengthened	Strongly Disagree	Toxicology by nature is a multidisciplinary field of research, and this is often not well-recognized by funding committees, whose composition is not focused on multidisciplinarity.	Strongly Agree	See above: we need collaboration to cover the multidisciplinary problems faced in toxicology	Strongly Agree	see above.	Agree	I slightly agree, some level of competition is always a driver for wanting to be better, however, we need to cooperate more.	Disagree	see above	Conflicted	Mixed feelings here. On the one hand academic institutions are forced to cooperate with other partners due to declining funding from government bodies. On the other hand society is suspicious to this cooperation. Moreover, many regulatory authorities want to be "independent" and not very keen on cooperation.	Strongly Agree	Strong feelings about this. We miss a lot of opportunities by missing out important research data. This could support the field in many ways, e.g.: 1. it would improve the synthesis of evidence for further research plans 2. it will certainly avoid duplication of animal experimentation.	Conflicted	Yes, one should be aware of COI, however one should expect that peer-reviewed papers would have clear policies to expose any COI in order to make clear what the value is of the paper	Agree	Yes, but we should be aware of the way it could be not so future proof. See e.g. the discussion on open-access; the overwhelming nr of online new so-called papers, etc.	Strongly Agree	Yes I do, and I would like to see that publishing policies of journals would have this in order. Most of the classical publishing houses have this, but I am not sure this is also the case for the new journals (for which we get dozens of invitations to submit papers daily!)	Disagree	This is the task of the editors: find appropriate reviewers! (doing this job myself for about 25 years, I know that it is often a difficult task to find appropriate ones give also the fact that it is a voluntary job)	Strongly Disagree	This is a bad idea, giving room for avoiding the problems of COI, etc. Moreover, in a high percentage of the manuscripts a good reviewer can easily find out who are the authors based on the content, reference list etc..	Agree	I agree here, however we need to find a solution for the financial consequences of this.	Yes	Institute or Employer	Not educated to degree level
37	Conflicted	,		.	Strongly Agree		Agree		Disagree		Disagree		Agree		Strongly Agree		Disagree		Agree		Disagree		Disagree		Strongly Agree	Then the research and science speaks for itself.	Strongly Agree	As a scientist, I believe it is always good to have data freely available so that the science may evolve.	No	Not applicable	Yes
36	Agree	No reason just a gut feeling	Conflicted	No reason just a gut feeling	Agree		Agree		Agree		Conflicted		Agree		Agree		Disagree		Agree		Conflicted		Conflicted		Agree		Agree		No	Not applicable	Yes
35	Conflicted		Disagree		Strongly Agree		Strongly Agree		Disagree		Strongly Agree		Strongly Agree		Strongly Agree		Agree		Agree		Strongly Agree		Disagree		Strongly Agree		Conflicted		Yes	Collaborator or industry sponsor	No
34	Disagree	Toxicology courses are closing down and their are reduced numbers of students coming into the field.	Conflicted	I think they should provide equality of opportunity but don't always do so.	Strongly Agree		Strongly Agree	Toxicology is an applied discipline and therefore there needs to be collaboration between practitioners and researchers to generate hypothesis driven research.	Disagree		Disagree		Conflicted	For some collaborations this exists but the perception of the conflicting interests of these 3 organisations often prevents effective collaboration.	Strongly Agree		Strongly Disagree	I assume research to be objective and truthfully reported regardless of who originates it.	Agree		Disagree		Agree		Agree		Strongly Agree		Yes	Institute or Employer	No
33	Agree		Disagree		Agree		Agree		Agree		Conflicted		Conflicted		Strongly Agree		Agree		Agree		Agree		Conflicted		Agree		Strongly Agree		Yes	Not applicable	Yes
32	Disagree	Toxicology research in my experience, where it is intended to address relevant toxicological questions of the time is largely funded privately by companies that own chemicals and need to have certain issues resolved	Strongly Disagree	Not when compared to cancer research, research on finding treatments for metabolic diseases, which are largely lifestyle driven and therefore don't need enormous amounts of money spent on pharmacological therapies. Money better spent on behavioural changes	Strongly Agree	Collaboration is essential to bring together the expertise from different disciplines needed for good toxicological research.	Conflicted	I don't see collaboration being more important in toxicology than any other discipline	Disagree	I don't believe that competition has anything to do with it. Most toxicological work as far as I can see is funded privately and funded based on need.	Disagree	see above	Conflicted	Yes and no, My issue is that on the whole regulatory authorities do a good job, but they are often difficult to deal with and can be fairly unhelpful. It should be more a collaborative approach.	Strongly Agree	However, as a lot of the funding is private, it is often up to individual companies if they want to publish the work	Conflicted	I do consider it, but if the experimental design is clear and well put together and attempts to actually answer the question posed in an open and honest manner, then I have no problem with conflict of interest. Poorly designed studies with skewed analysis however make me very sceptical of the data.	Conflicted	Appropriate yes, fair not always. Depends on the reviewer and their personal agenda sometimes	Agree	See above	Agree	In some cases yes, they completely miss the point and if they see industry funding they often become very difficult.	Conflicted	I hadn't considered it by yes, assuming the reviewer has the appropriate expertise and will review the manuscript fairly.	Strongly Agree	I believe publishing houses are taking the scientific community for a ride. You don't even get access to your work unless you have subscription or access to one. The whole thing is a scam in my view to make money often from charity funded projects.	No		Yes
31	Disagree	All of my funding comes from the EU	Disagree	Traditional blue skies disciplines are better considered. I have heard quotes such as i’m Not interested if something dies. There is a perception that we just measure cell death	Strongly Agree	We need to evolve in collaboration with other disciplines in order to address hazards of key emerging technologies	Strongly Agree	See above	Strongly Agree	Competition drives quality, but so does collaboration	Agree	As above	Disagree	Currently lack access to good inhalation research facilities in uk other than via stretched hpe or expensive cro’s. We collaborate internationally to do this	Agree	Need to use data repository as in nano field at eu scale	Agree	I don’t have any industrial or commercial conflicts, but of course I am aware who my competitors are. I always try to be fair and constructive	Disagree	I have had publications held up by editors in the US, returning months later without even going to peer review	Strongly Agree	See q 10	Disagree	I have been a journal editor. Some reviewers are poor, others are excellent. That’s life	Strongly Agree	Why do you need to know who the author is to review a paper? It’s often easy to work out the authors though as they will cite themselves and could have presented the work at conferences	Strongly Agree	However EU grants do not provide funding for publications after the end of the project!	Yes	Competitive research award I received	No
30	Conflicted	I think so, but cannot evidence therefore can neither agree or disagree.	Agree		Agree		Agree	As still a relatively young discipline under massive pressure to continually innovate new methodologies for demonstrating impact its vital that what is known is shared so that nothing is missed.	Conflicted	There has to be something driving innovation - but I think collaboration is more important	Disagree		Conflicted		Agree		Agree		Agree				Strongly Agree	To many examples in real life/time where 'experts' are challenged for decisions lacking in science	Conflicted		Conflicted		No		Yes
29	Disagree	There are not enough universities providing toxicology and industry toxicology is getting less and less. The only places doing toxicology research seem to be CROs.	Disagree		Agree		Strongly Agree		Agree		Agree		Disagree	Academia seems to be performing research which has no connection or value to industry or the regulators. There are a few universities which do this (Dundee), but in general this is not happening.	Conflicted		Agree		Agree		Agree		Conflicted		Agree		Strongly Agree		No	Not applicable	Yes
28	Agree	Compared to other sciences and the arts, there is a fair amount of funding. There is, as ever, a lot more to do!	Agree		Strongly Agree		Strongly Agree		Conflicted		Conflicted		Conflicted		Strongly Agree		Agree		Disagree		Agree		Agree		Strongly Agree		Strongly Agree		Yes	Competitive research award a co-author had received	No
27	Agree	Toxicology is a discipline that overlaps biology, chemistry, pharmacognosy, pharmacology in humans. Medicines are based on chemicals that are researched and used in appropriate formulations for their efficacy. Diagnosis are carried on living cells, animals, in vivo to find any harmful toxic side effects. Clinical tests are done on patients.This is adequately done for toxicity in UK on medicines b…	Disagree	I think main council funds bodies who receive are medical. Other councils on forensic- poison, analysis, drugs, witness, for protection/control -all for environment do not have much benefit.	Strongly Agree	Toxicology mainly performed in hospitals; further degrees in toxicology should be encouraged as a vital subject that can also help public health and their collaboration will help hospitals eg for over drinking/smoking health damages.	Strongly Agree	As explained above will encourage people to be responsible in drinking & smoking control, will definitely improve environment. So in this case, Partnerships with different bodies will be helpful.	Conflicted	Investment with collaboration shared will be helpful.	Agree	With collaboration different types of tests can be shared at appropriate sites; goals can be met with all results concluded from sites. Initial tests can be discussed at each site to perform tasks.	Agree	All tests will meet regulation(s) and conform to accredited criteria.	Strongly Agree	I disagree because toxicology available on a specific target of research data provided may not comply to my information. So impact would be a different assay that will not be validated for my requirement. So will not be efficient to me.	Agree	As explained above	Agree	Information from peer review are expected within standards and in adherence with its research of subject.	Disagree	Peer review are comprehensive papers are mostly within their validity of subject; otherwise publication would not provide an approval. It is like patenting a paper on a subject through an attorney.	Disagree	The reviewers chosen obviously will have be with appropriate knowledge of toxicity to review research. Understanding after effects on toxicity would be essential to make his correct judgement.	Strongly Disagree	Naming/Non Naming of author has no matter of concern on the paper. It is the contents in it that is the concerning matter. Contents are most important that comply to the subject concerned.	Strongly Agree	An open access can explain subject more clearly by understanding of its purpose. Reader can, then, raise different views, agree or disagree.	Yes	As an employer I have formulated products that have obtained patents, filed patents -myself being as an Inventor	Yes
26	Strongly Disagree	The funding of strategic research for the development of quantitative, biologically based chemical safety assessment in government agencies that perform toxicology based chemical safety assessments has now become non-existent	Conflicted	We are told that "toxicology" research must be rebranded in order to have any chance of funding	Strongly Agree	The future of research is multi-disciplinary collaboration	Strongly Agree	Developments on omics technologies and their application in personalised/precision medicine have huge potential for applications in chemical safety assessment.Collaboration is necessary.	Conflicted	Competition is necessary to counter complacency. But how much competition is good when research funds are scant.	Conflicted	see previous response	Conflicted	I am unaware of any such infrastructure in safety toxicology	Strongly Agree	There is no question that easy ,rapid access to data would facilitate toxicological research	Agree	This is self-evident	Conflicted	It suffers from lack of resource. Fewer and fewer reviewers available.	Agree	This is self-evident	Conflicted	Most Journals do have good guidance.	Agree	This should eliminate personal bias when reviewer knows the author	Strongly Agree	Open access, is rapid access - this facilitates the research process.	Yes	Institute or Employer	No
25	Conflicted		Conflicted		Strongly Agree		Conflicted		Agree		Disagree		Agree		Agree		Agree		Agree		Agree		Disagree		Conflicted		Conflicted		No	Not applicable	No
24	Disagree	Toxicology research receives insufficient support from research funding agencies and from industry.	Disagree		Strongly Agree	Toxicology research being multi-disciplinary requires collaborative efforts to cover the wider range of expertise needed.	Agree	Toxicology research being multi-disciplinary requires collaborative efforts to cover the wider range of expertise needed.	Agree	Competition is important in any field of science.	Disagree	Competition is important in any field of science.	Disagree	Too much emphasis on studentships. What is needed are long-term program grants to ensure continuity of the research.	Conflicted	Openness in research is important, no matter which field.	Conflicted	Question is not clear. Manuscripts being peer reviewed or published papers?	Conflicted	The fact that it is anonymous has pro's and con's. The lack of peer reviewing stringency seen in predatory journals is becoming a concern.	Disagree	The reviewing process should be fair and be based on the available evidence only.	Disagree		Agree	but it is difficult for the authors to remain completely anonymous when reading the manuscript	Conflicted	Yes for the reader, no for the scientist submitting the manuscript. The money has to come from somewhere.	Yes	Collaborator or industry sponsor	Yes
23	Disagree	lack of funding. RCUK do not fund much of (at least basic) research	Strongly Disagree	see above	Agree	It is a multidisciplinary science who needs pooled expertise across disciplines including chemistry, analytical science, biology	Agree		Agree		Agree		Conflicted	not sure this is in place properly	Agree		Disagree		Agree		Agree		Disagree		Agree		Agree	but very expensive!	Yes	Institute or Employer	No
22	Strongly Disagree		Strongly Disagree		Agree		Conflicted	I don't think it is an more or less important compared to other disciplines. It is important to all.	Agree		Conflicted		Strongly Disagree		Conflicted		Agree		Agree		Agree		Disagree		Agree		Strongly Agree		No	Not applicable	No
21	Disagree	There are few toxicology departments in UK universities and funding of research is hampered by this lack of interest within the universities.	Disagree	Keeping the MRC Toxicology Unit going has been a struggle and now has transferred (been rescued!) by the University of Cambridge. It is my view that the problems the unit has experienced over the years are related to a favouring of fundamental research and a lack of interest in applied research by research funding councils.	Strongly Agree	Cutting edge and mechanistic research nearly always involves multiple sills which no on researcher will have.	Disagree		Disagree	Collaboration is more important than competition.	Disagree		Disagree	Some years ago I, as a regulatory toxicologist, I saw how difficult it was to interest academic or MRC researchers in toxicology issues of particular interest to regulators, who themselves had no facilities for research and little funds t offer to researchers. Industry/academia probably works better.	Strongly Agree	The statement applies to all research, unless there are good reasons for confidentiality.	Disagree	If the work has been well peer reviewed and appears in a reputable journal, its value should be assessed on its own merits and its plausibility in relation to other related published findings.	Conflicted	Peer review has its issues and it depends on the quality of the peer review, but on balance I think it is the best of all the slightly flawed options. I would like to see more journals going for peer review in which the reviewer is blinded to researchers' names and affiliations.	Disagree	I try to assess on its scientific merits.	Agree	Most peer reviewers seem to 'learn by doing'. Universities and research institutes should put on short courses about peer review (some do) and ensure that post-gradate students are mentored by their supervisors in peer review.	Agree	It avoids accusations of bias, but in some areas of research, the experts will know just by reading a manuscript which group or person has written it.	Strongly Agree	Lack of open access is a huge problem for developing countries in which researchers cannot afford to pay for viewing papers.	No	Not applicable	No
20	Disagree	Shortage of qualified toxicologists to fill our vacancies	Strongly Disagree	Its very difficult to get funding for toxicology research compared with other disciplines	Strongly Agree	Collaboration is the key to moving any discipline forward especially with limited resources	Strongly Agree	Pooling of experience and knowledge is key for the discipline of toxicology since it requires the integration of so many different subjects (maths, chemistry, physiology etx)	Agree	Competition drives innovation which is key	Conflicted	I dont think toxicology differs from any other discipline in the need for competition to drive innovation	Agree	To a point yes but always room to improve. We need all three sectors around the table to gain traction and to speed up change	Strongly Agree	It would be excellent if all data were open to all - avoids repeating experiments and maximises impact	Conflicted	Hmmm....if I was aware of a REAL conflict of interest then maybe yes but we must be very cautious in accusing fellow scientists of COI just based on their employer or sources of grant funding.	Agree	Generally, I think it works.	Agree	Yes, but again only if it is a REAL conflict of interest rather than inferred just because of employer or sources of grant funding.	Conflicted	I believe most reviewers do a great job but there are too many examples of poor papers making it to press. Could we all be trained in what to look for and maintain that training perhaps with 2-year refreshers before we are allowed to peer review?	Disagree	Maybe, but I think hard to acheive	Strongly Agree	This is the future but we need to find a way for it to be open to all irrespective of ability to pay (since leaving big pharma none of my papers have been OA since I dont have a budget!)	Yes	Collaborator or industry sponsor	No
19	Disagree	Very limited academic posts so no real career structure. Extensive lack of contact with most of medical and veterinary professions and their training programmes. Very limited training in toxicological pathology and then almsot restricted to vets. Excessive concentration on aspects biochemical and molecualr toxicology relative to risk analysis and risk-benefit assessment	Strongly Disagree	With the excpetioon of a few aspects of xenobiotic metabolism and limited approaches to molecualr biology there is almost no support nor interest in other areas	Strongly Agree	Collaboration must extend through biochemistry, pharmacolgy and molecular biology to patholgy, human and animal medicine and into environemtnal areas. Need much ore interst andactivity in data analysis and presentation and modelling areas.	Strongly Agree	Its very nature forces it to be multidisciplinary	Strongly Agree	We all compete.	Conflicted	Competition importnat in driving research and development of best practices but it restricts scarce resources and favours the already well-established	Strongly Disagree	Where is it in practice? Must add governemnt agencies beyond regulatory authorities, e.g. Public Health England and DEFRA	Strongly Agree	Yess but trite and obvious	Strongly Agree	Essential. Literature contains too many concealed partial reports	Agree	Faute de mieux	Strongly Agree	Essential as to topic investigated and aspects not covered and the quality of the work and the conclusions presented.	Agree	Yes but almost inevitable given the breadth of the discipline	Conflicted	Good principle but a nightmare in practice - time and resources required and cocnern over potential conflicts by reviewers	Strongly Agree		Yes	Collaborator or industry sponsor	No
18	Disagree	When conducting annual reviews of scientific papers published on pesticide toxicology there were very few papers published in UK on toxicology of pesticides.	Disagree	I can't see much incentive to fund independent research to investigate if something is toxic unless there is a lot of public concern whipped up eg about glyphosate. Why would industry want to show if there substance is harmful - they would probably prefer not to look.	Agree	Can pool expertise and resource.	Agree	A lot of chemical companies keep studies confidential under data protection laws and may sell data to rival companies. They have invested a lot of money in studies so need compensating but it may hinder collaboration.	Disagree	I think there are probably not a lot of drivers to compete - though if a chemical is found to be toxic there becomes a commercial incentive to research adverse findings but also a conflict of interest if the company selling a chemical agent is trying to prove it is not toxic.	Disagree	See comment for question 5	Disagree	I work as a government regulator and we only have tenuous links with academia. We do have good links with industry.	Strongly Agree	Information shared allows it to be transparently and openly reviewed (like Wikipedia) would increase public and media awareness, allowing for peer review of the findings. If any scientist has research in similar areas it opens up doors to international collaboration.	Strongly Agree	Who is going to fund you if you consistently report findings unpalatable to the funder? A restraint on research is that the funder will only be incentivized to fund research that has financial benefit to them. A lot of areas therefore are poorly funded such as toxicology.	Conflicted	I don't have much experience of this so feel unable to give an informed opinion.	Agree	I do evaluate scientific studies produced by industry for regulatory purposes rather than research publications, and for these I am aware that there may be a conflict of interest.	Conflicted	I don't have much experience of this so feel unable to give an informed opinion. See answer to Q10.	Agree	I have not heard of this before but it would be a way of reducing unconscious bias.	Strongly Agree	I find it frustrating that a lot of scientific papers are not freely available. I understand why they need to charge for them but the public and others then may not have enough funds to access all the research available. So it favours the rich having more access to data than the poor and is a source of inequality.	No		Yes
17	Disagree	The big companies have restructured and are no longer funding toxicology research, and this shortfall has not been adequately filled by universities or other industrial groups	Strongly Disagree	Opportunity seems to be seriously balanced towards "trendy" science. Toxicology is not trendy!	Strongly Agree	This simply stands to reason, especially given the demise of the industrial toxicology groups which had the capacity to be self-sufficient in the multiple disciplines necessary for effective toxicology research	Strongly Agree	See above. Toxicology is essentially a multi-disciplinary area, so collaboration is especially important to cover all the bases.	Conflicted	Conflicted because I don't think we can afford duplication of effort, but at the same time competition does tend to improve "performance".	Conflicted	See above	Agree	Infrastructure can always be improved, but there is a good collaborative spirit between the different sponsoring authorities.	Strongly Agree	No need to explain this	Disagree	I default to accepting the credibility of research authors, whoever their sponsors, until conflict of interest, or corruption, is clearly demonstrated.	Agree	All peer reviewers are too busy and find it hard to do justice to the papers they are reviewing by spending enough time on them. But I've no experience of a better system.	Disagree	See above	Conflicted	I'm sure this can be the case, but as individual researchers we can often be too precious about the unique and special nature of our own work.	Strongly Agree	It's obvious	Strongly Agree	As an independent, I now find it difficult and expensive to access the full extent of literature I sometimes want to see.	No		No
16	Strongly Disagree		Strongly Disagree		Strongly Agree		Conflicted		Conflicted		Conflicted		Agree		Agree		Agree		Conflicted		Agree		Conflicted		Agree		Strongly Agree		No		Yes
15	Strongly Disagree		Conflicted		Agree		Agree		Disagree		Disagree		Disagree		Disagree		Agree		Agree		Agree		Agree		Agree		Strongly Disagree	Open access promotes lower quality and vanity publishing which is driven by revenue generation and not scientific merit.	No		No
14	Conflicted	I have not worked in the UK for 36 years, so I am not in a position to answer this question.		I have not worked in the UK for 36 years, so I am not in a position to answer this question.		I have not worked in the UK for 36 years, so I am not in a position to answer this question.	Agree		Disagree		Disagree		Agree	My answer applies to the USA where I work.	Strongly Agree	With respect to toxicology findings in new classes of drugs, making findings available would be very beneficial to others working in the field.	Strongly Agree		Agree		Strongly Agree		Disagree		Strongly Disagree	In that case, how could you determine if there is a conflict of interest?	Strongly Agree		No		Yes
13	Disagree	The funding of toxicology in the UK has been diminishing for some years and the pharma industry has also been desimated	Disagree	Funding bodies always fund buzz science and for some reasons this is not the perception they have of toxicology	Strongly Agree	The economy of scale for multi-stakeholder research far outstrips the capability of individual labs - this will be a major issue post Brexit	Strongly Agree	Sharing research can accelerate the quality and output from programmes	Conflicted	To a point, but if the competition becomes too great then only a few specialities in toxicology win through - the MRC Toxicology Unit is a classical example of research becoming too narrow	Conflicted	see above	Disagree	The infrastructure in academia for toxicology research has fallen apart in the UK over the last decade with fewer institutions offering the training	Conflicted	To a point, but industry and academia will always want to capitalise on unique science - the issue translating the research into tangible deliverables	Conflicted	Sometimes, funding can give the answers the sponsor wants rather than it being independent	Disagree	There are many examples where only sensational findings are published over no effect data as this is what gets in journals and attracts funding	Agree	This must be considered in the review of the findings	Conflicted	This may be the case with junior reviewers, but experienced toxicologist should already be aware of the potential conflicts	Conflicted	difficult to assess if this is successful as it may question the validity of the science	Agree	it is essential to share good science for the benefit of all	No		Yes
12	Conflicted	I am not sure how well funded it is	Conflicted	Not sure I am qualified enough to answer. Not familiar with what is/is not funded	Strongly Agree	Collaboration is a really good driving force and can help increase innovation	Strongly Agree	Collaboration across many disciplines is really important. Many researchers are not aware how applicable their research is to toxicology	Conflicted		Conflicted		Agree	There are organisations and consortia that foster relationships and collaborations between sectors and disciplines. e.g. NC3Rs	Strongly Agree	Making research accessible is crucial to improve uptake and impact of research efforts and developments	Agree		Conflicted	Decisions on acceptance of publication can often come down to the opinion of one reviewer, which may be based on opinion rather than scientific fact	Agree		Agree	More training from journals would be useful, to ensure considerations are based on sound scientific fact	Strongly Agree	Sometimes reviewers may be influenced by the author, and their scientific credibility/reputation, rather than the scientific work in hand	Strongly Agree		Yes	Institute or Employer	No
11	Disagree		Conflicted		Strongly Agree		Strongly Agree		Disagree		Disagree		Conflicted		Strongly Agree		Agree		Agree		Strongly Agree		Conflicted		Strongly Agree		Strongly Agree		No		Yes
10	Agree		Disagree		Strongly Agree		Strongly Agree		Disagree		Disagree		Agree		Strongly Agree		Agree		Agree		Agree		Disagree		Agree		Agree		Yes	Institute or Employer	No
9	Strongly Disagree	I perceive the number of facilities capable of offering research in toxicology, and the number of toxicologists, as declining. Many of the publications I see as important research are authored outside the UK.	Conflicted	I have no good knowledge of the contribution of research funding councils.	Agree	Toxicology is a multi-disciplinary science; I get valuable feedback from people with different viewpoints and training.	Agree	See previous answer	Conflicted	If there are competitive advantages to a practice within toxicology, I don't get to see it (commercial confidentiality). Confidential study results may lead to animal studies being duplicated.	Disagree	See previous answer, for which "especial importance" does not add strength to the argument.	Disagree	I don't see as possible to easily set up a toxicology research programme between industry and academia, far less to get perceptive input from a regulatory authority.	Agree		Agree		Disagree	I have felt compelled to review research on which I'm not well qualified, due to perceived shortage of other reviewers; but don't get asked to review research on which I am well-qualified. Some questionable articles appear to get published.	Disagree	I try to ensure that my views are not subject to CoI and that the validity of the research is neutrally-assessed.	Strongly Agree	I have felt compelled to review research on which I'm not well qualified, due to perceived shortage of other reviewers; but don't get asked to review research on which I am well-qualified. Some questionable articles appear to get published.	Conflicted	While blinding may be politically correct, there are other faults with the review system that deserve higher priority.	Strongly Agree		No	Not applicable	No
8	Conflicted	Not close enough to judge	Conflicted	As above	Agree	Industry-academia collaboration especially important	Agree	Academia can get rather specialised and introverted left to its own devices	Conflicted	Cannot judge from my situation	Conflicted	As above	Conflicted	Cannot judge	Strongly Agree	The ideal situation but many companies are wary of this	Strongly Agree	Regulatory bodies seem unaware of wider conflicts of interest. For example the only conflict acknowledged by EMA relates to ties with the pharma industry while very strong links with other bodies such as EDQM are considered to be bias-free.	Agree	In my experience the system generally works OK	Strongly Agree	An issue not well recognised is that of "spoiler" papers; in other words research sponsored by a company, often at a university, intended to make things as difficult as possible for competitors. FDA seems to be much more cautious in accepting results from this kind of research than EMA or other European agencies (eg EFSA)	Disagree	Had a few difficulties with my own publications - reviewers missing the point and/or trying to impose their own perceptions.	Agree	This should be evaluated in a pilot study.	Agree	A good idea for some but not all researchers.	No		Yes
7	Conflicted	N	Conflicted	N	Strongly Agree	N	Strongly Agree	N	Agree	N	Agree	N	Conflicted	N	Agree	N	Agree	N	Agree	N	Agree	N	Conflicted	N	Agree	N	Agree	N	No		Not applicable
6	Disagree	Too often driven by short-term goals	Agree		Strongly Agree		Strongly Agree	it is important to bring together regulators academics and R&D companies to ensure appropriate strategies	Strongly Disagree	Often wastes resources on divergent paths or on duplication of effort.	Conflicted		Agree		Strongly Agree	I fully support openness in research particularly where safety is concerned but researchers must learn to avoid sensationalising results to gain further funding	Agree		Conflicted	I find many papers seem to creep into print without adequate peer-review and add to confusion rather than clarity	Agree		Conflicted	The peer-review process depends on voluntary effort with little reward and as such may not attract the best quality judgement	Agree	Should not be a problem if there is no prejudice	Strongly Agree	As long as they are properly reviewed beforehand.	No		No
5	Strongly Disagree	Toxicity is a major factor in all mechanisms leading to ill health and in controlling pests and infectious organisms.	Strongly Disagree	Most funding councils do not understand toxicology and there are too few toxicologists active in research.	Strongly Agree	Toxicology research requires multidisciplinary teams.	Strongly Agree	See previous question.	Disagree	Toxicology personnel and resources would be wasted in a competitive system	Strongly Disagree		Conflicted	Observation.	Agree	A general truth for most research.	Agree	Axiomatic.	Conflicted	Observation.	Agree	Axiomatic.	Agree	Observation.	Disagree	Too simplistic.	Agree	Any restriction of access handicaps science progress.	Yes	Institute or Employer	Not applicable
4	Disagree		Disagree		Strongly Agree		Agree		Disagree		Strongly Disagree		Disagree		Strongly Agree		Conflicted		Conflicted			I am rarely involved in peer reviews at the moment	Agree	Based on my past experience of peer reviewing, where little training was provided	Agree		Agree		No	Not applicable	No
3	Strongly Disagree	AS an "applied" science Toxicology seems to be top of no-ones list	Disagree	As a former member of the MRC and Chairman of its Systems Board the support of the Unit was dependent of Health Service Need s rather than scholarchip	Agree		Disagree	Its just research, no different from any other kind in Biology	Strongly Disagree	You don't get funding for competition; there are too few groups for this to be a realistic driver	Disagree		Strongly Disagree	There is no formal body to evaluates the efficacy of testing regimes, for example. With the value of many short term tests problematic and the questioning of the value of long-term rodent studies this is an urgent problem	Strongly Agree	Nature and Science have both had endless articles on this and reproducabity - that requires properly defined protocols.	Agree		Agree		Agree		Agree	There is a real biological deficit in understanding the proper use of statistics.	Agree		Agree		No	Not applicable	No
2	Strongly Disagree		Strongly Disagree	Toxicology has become a forgotten discipline and post Brexit will now become key to chemical safety decision making. We need more independent academic researchers to act as independent advisors to government.	Strongly Agree		Strongly Agree	The data is not always black and white. Different experts can design and interpret studies in different ways. To come to agreements for regulatory harmonisation using tox data, collaboration and cooperation is essential in this area.	Strongly Disagree	There is essential work that needs to be done and should be funded centrally. Safety testing and the development of test methods for assessing safety should not be derived from a competitive marketplace.	Strongly Disagree		Strongly Disagree	This needs to be much better developed for the UK to be seen as a world leader in toxicology research for supporting chemicals innovation.	Strongly Agree		Strongly Agree		Agree		Strongly Agree		Disagree		Agree	how would you check for conflicts?	Agree	Whilst remembering - industry can always pay upfront costs for open access. Not all authors can find the funds. Care is needed so the system does not generate industry bias.	Yes	Collaborator or industry sponsor	No
1	Disagree	As a medical toxicologist I can say that this is only really supported as far as terrorism is concerned Research in acute patient care in poisoning in a clinical environment is no seen as a priority	Conflicted	As I have no direct experience of other disciplines I am uncertain, but they tend to be dominated by what I would think as a bit reserche	Strongly Agree	This is critical. research in isolation in any subdivision is always a challenge	Disagree	This applies to all disciplines	Conflicted	Really don't know about this, always doubt competition is that key	Conflicted	As previous response	Disagree	Not in clinical side of toxicology. Industry doesn't want to know and regulator says yes and does nothing!	Agree	This key in all academic research	Agree		Agree		Strongly Agree	This is a very important issue	Conflicted	Really have no idea	Conflicted	I think referees should be open, less sure of authors	Agree		Yes	Co author welcome funded	No

## Sheet: Summarised data Q1-14a
		Question 1	Question 2	Question 3	Question 4	Question 5	Question 6	Question 7	Question 8	Question 9	Question 10	Question 11	Question 12	Question 13	Question 14a	Question 14b	Question 14c
Strongly Agree		1	0	71	0	5	3	1	45	20	4	24	7	19	48
Agree		11	13	26	32	33	17	24	41	49	56	44	30	46	41
Conflicted		27	31	2	10	32	37	32	12	14	32	12	41	24	8
Disagree		41	30	0	7	25	31	31	2	16	6	14	20	7	2
Strongly disagree		19	22	0	50	5	9	12	0	1	1	2	1	4	1
Blank		1	4	1	1	0	3	0	0	0	1	4	1	0	0	7
Yes																37
No																56
		100	100	100	100	100	100	100	100	100	100	100	100	100	100	100	0

## Sheet: Bar charts
																									Question 1: "I believe toxicology research is adequately resourced in the UK"
																									Question 2: "When compared to other disciplines, I believe the research funding councils and other funding bodies provide equality of opportunity to facilitate toxicology research"
																									Question 3: "I believe collaboration to be important in driving toxicology research in the UK"
																									Question 4: "When compared to other disciplines, I believe collaboration to be especially important in driving toxicology research"
																									Question 5: " I believe competition to be important in driving toxicology research in the UK"
																									Question 6: "When compared to other disciplines, I believe competition to be especially important in driving toxicology research
																									Question 7: "I believe there is a good infrastructure to support research between academia, industry and the regulatory authorities"
																									Question 8: "I believe making toxicology research data openly available with as few restrictions as possible in a timely and responsible manner would improve the impact and efficiency of toxicological research"
																									OUTPUTS and PUBLICATION
																									Question 9: "When reading research publications, I consider whether there is a conflict of interest when assessing the validity of research
																									Question 10: "I believe the current system of peer review for research outputs is a fair and appropriate system
																									Question 11: "When peer reviewing research publications, I consider whether there is a conflict of interest when assessing the validity of research"
																									Question 12: "I believe reviewers are often not sufficiently trained to adequately and fairly judge the merit, quality and impact of toxicology research"
																									Question 13: "I believe double-blind peer review, where both reviewer and author are anonymised, is a good idea"
																									Question 14a: "I believe open access publication, where articles are available free at source, is a good idea

## Sheet: Pie chart Q7
Question 7: "I believe there is a good infrastructure to support research between academia, industry and the regulatory authorities"
											Strongly Agree
											Agree
											Conflicted
											Disagree
											Strongly disagree

## Sheet: Pivot Tables 1 2
	Count of Entry #	Column Labels
	Row Labels	Agree	Conflicted	Disagree	Strongly Disagree	(blank)	Grand Total
	Strongly Agree	1					1
	Agree	4	3	4			11
	Conflicted	5	13	7		2	27
	Disagree	3	11	15	11	1	41
	Strongly Disagree		4	4	11		19
	(blank)					1	1
	Grand Total	13	31	30	22	4	100
	Rows: Question 1
	Columns: Question 2

## Sheet: Pivot Tables 3 4
Count of Entry #	Column Labels
Row Labels	Agree	Conflicted	Disagree	Strongly Agree	(blank)	Grand Total
Agree	16	2	3	4	1	26
Conflicted		1	1			2
Strongly Agree	15	7	3	46		71
(blank)	1					1
Grand Total	32	10	7	50	1	100
Rows Q3
Column Q4
Of the 71 who SA Q3, 46 of them SAs Q4.

## Sheet: Pivot Tables 1 and 5
Count of Entry #	Column Labels
Row Labels	Agree	Conflicted	Disagree	Strongly Agree	Strongly Disagree	(blank)	Grand Total
Agree	3	6	2				11
Conflicted	8	9	9		1		27
Disagree	17	11	10	2	1		41
Strongly Agree		1					1
Strongly Disagree	5	5	3	3	2	1	19
(blank)			1				1
Grand Total	33	32	25	5	4	1	100

## Sheet: Pivot Tables 5 6
Count of Entry #	Column Labels
Row Labels	Agree	Conflicted	Disagree	Strongly Agree	Strongly Disagree	(blank)	Grand Total
Agree	12	8	11	1		1	33
Conflicted	3	26	2		1		32
Disagree		1	17	1	6		25
Strongly Agree	2	1		1		1	5
Strongly Disagree		1	1		2		4
(blank)						1	1
Grand Total	17	37	31	3	9	3	100
Rows Q5
Column Q6

## Sheet: Pivot Tables 10 13
Count of Entry #	Column Labels
Row Labels	Agree	Conflicted	Disagree	Strongly Agree	Strongly Disagree	Grand Total
Agree	29	10	2	11	4	56
Conflicted	16	11	2	3		32
Disagree		2		4		6
Strongly Agree	1		3			4
Strongly Disagree		1				1
(blank)				1		1
Grand Total	46	24	7	19	4	100
Peer review

## Sheet: Pivot Tables 8 14a
Count of Entry #	Column Labels
Row Labels	Agree	Conflicted	Disagree	Strongly Agree	Strongly Disagree	Grand Total
Agree	21	5	2	13		41
Conflicted	9	1		2		12
Disagree	1				1	2
Strongly Agree	10	2		33		45
Grand Total	41	8	2	48	1	100

[truncated: 2 more sheets: Pivot Tables 9 11, Pivot Tables 10 12]
